# Supplementary material for: Migraine, headache, and mortality in women: a cohort study
Source: PubMed Central journal article supplement (PMC7079482; doi:10.1186/s10194-020-01091-9), 2020-03-17
Supplement: 10194_2020_1091_MOESM1_ESM.pdf [file 10194_2020_1091_MOESM1_ESM.pdf]

**Supplementary Table 1. Baseline characteristics according to migraine subtypes or non-migraine headache status (N=27,844)**

| Characteristic at baseline                    | Migraine or headache status (5 categories) |                                    |                                 |                                    |                           |
|-----------------------------------------------|--------------------------------------------|------------------------------------|---------------------------------|------------------------------------|---------------------------|
|                                               | No history<br>N = 18,691                   | Non-migraine headache<br>N = 4,025 | Migraine with aura<br>N = 1,435 | Migraine without aura<br>N = 2,175 | Past history<br>N = 1,518 |
| Age, mean, years                              | 55.2 (7.3)                                 | 53.5 (6.4)                         | 53.2 (6.1)                      | 52.6 (5.6)                         | 55.5 (7.4)                |
| Body mass index, mean (SD), kg/m <sup>2</sup> | 25.8 (4.9)                                 | 26.2 (5.2)                         | 25.9 (4.8)                      | 26.3 (5.2)                         | 26.1 (5.1)                |
| Total cholesterol, median (IQR), mg/dL        | 208<br>(184-235)                           | 207<br>(183-235)                   | 208<br>(184-236)                | 207<br>(183-234)                   | 212<br>(187-240)          |
| Smoking status, %                             |                                            |                                    |                                 |                                    |                           |
| Never                                         | 50.8                                       | 52.7                               | 52.8                            | 56.6                               | 50.8                      |
| Past                                          | 37.3                                       | 35.8                               | 36.6                            | 33.8                               | 35.4                      |
| Current                                       | 11.8                                       | 11.4                               | 10.5                            | 9.6                                | 13.8                      |
| Alcohol consumption, %                        |                                            |                                    |                                 |                                    |                           |
| Rarely/never                                  | 42.7                                       | 47.2                               | 48.4                            | 47.5                               | 45.3                      |
| 1-3 drinks/month                              | 12.9                                       | 13.6                               | 13.0                            | 15.5                               | 14.2                      |
| 1-6 drinks/week                               | 32.9                                       | 31.2                               | 30.8                            | 30.1                               | 30.2                      |
| ≥1 drink per day                              | 11.4                                       | 8.1                                | 7.8                             | 6.9                                | 10.3                      |
| Vigorous physical activity, %                 |                                            |                                    |                                 |                                    |                           |
| Rarely/never                                  | 37.2                                       | 36.4                               | 37.3                            | 38.3                               | 39.1                      |
| <1/week                                       | 18.8                                       | 20.8                               | 21.1                            | 22.6                               | 20.2                      |
| 1-3 times/week                                | 31.9                                       | 33.5                               | 31.3                            | 29.6                               | 29.2                      |
| ≥4 times/week                                 | 12.1                                       | 9.2                                | 10.3                            | 9.5                                | 11.4                      |
| Diabetes, %                                   | 2.4                                        | 3.3                                | 1.7                             | 1.7                                | 2.7                       |
| History of hypertension, %                    | 24.8                                       | 25.3                               | 23.9                            | 24.1                               | 31.2                      |
| Family history of:, %                         |                                            |                                    |                                 |                                    |                           |
| Myocardial infarction <sup>a</sup>            | 13.6                                       | 15.4                               | 16.1                            | 14.8                               | 15.2                      |
| Colorectal cancer <sup>b</sup>                | 10.7                                       | 9.8                                | 9.8                             | 8.8                                | 10.7                      |
| Ovarian cancer <sup>c</sup>                   | 2.8                                        | 2.8                                | 3.1                             | 3.0                                | 3.8                       |
| Breast cancer <sup>d</sup>                    | 6.3                                        | 5.8                                | 6.1                             | 5.6                                | 6.2                       |

Numbers may not add up to 100% because of rounding or missing data. All variables were measured at baseline. Medical history information was self-reported.

Abbreviations: SD, standard deviation; IQR, interquartile range; cig, cigarettes

<sup>a</sup> in parent aged less than 60 years

<sup>b</sup> in mother, father, brother or sister at any age

<sup>c</sup> in mother or sister at any age

<sup>d</sup> in mother or sister aged less than 60 years

**Supplementary Table 2. Fine-Gray subdistribution age- and multivariable-adjusted hazard ratios for cause-specific mortality accounting for competing risks according to migraine or headache status (N=27,844).**

| <b>Migraine or headache status:</b>        | <b>No history,<br/>(N=18,691)</b> | <b>Non-migraine<br/>headache,<br/>(N=4,025)</b> | <b>Any migraine,<br/>(N=5,128)</b> |
|--------------------------------------------|-----------------------------------|-------------------------------------------------|------------------------------------|
|                                            | <b>HR (95% CI)</b>                | <b>HR (95% CI)</b>                              | <b>HR (95% CI)</b>                 |
| <b>Cardiovascular death, N</b>             | <b>281</b>                        | <b>46</b>                                       | <b>59</b>                          |
| Age-adjusted <sup>a</sup>                  | 1 (ref)                           | 1.07 (0.78-1.45)                                | 1.05 (0.79-1.39)                   |
| Multivariable-adjusted <sup>b</sup>        | 1 (ref)                           | 0.98 (0.71-1.34)                                | 1.06 (0.80-1.40)                   |
| <b>Cancer death, N</b>                     | <b>861</b>                        | <b>164</b>                                      | <b>199</b>                         |
| Age-adjusted <sup>a</sup>                  | 1 (ref)                           | 1.01 (0.85-1.19)                                | 0.96 (0.82-1.12)                   |
| Multivariable-adjusted <sup>b</sup>        | 1 (ref)                           | 1.02 (0.86-1.20)                                | 0.98 (0.84-1.15)                   |
| <b>Female-specific cancer<br/>death, N</b> | <b>248</b>                        | <b>41</b>                                       | <b>53</b>                          |
| Age-adjusted <sup>a</sup>                  | 1 (ref)                           | 0.85 (0.61-1.18)                                | 0.86 (0.64-1.16)                   |
| Multivariable-adjusted <sup>b</sup>        | 1 (ref)                           | 0.87 (0.62-1.21)                                | 0.88 (0.65-1.18)                   |

Abbreviations: HR, hazard ratio; CI, confidence interval; ref, reference category.

Hazard ratios and corresponding 95% confidence intervals were estimated using Fine-Gray subdistribution hazard models. For each model, any deaths due to causes other than the cause of interest were treated as competing events in the models.

<sup>a</sup>Adjusted for age at baseline

<sup>b</sup>Adjusted for the following variables measured at baseline: age, BMI, total cholesterol, smoking, alcohol use, physical activity, diabetes, hypertension, family history of myocardial infarction, and family history of cancer (categorizations described in detail in the Methods).

**Supplementary Table 3. Fine-Gray subdistribution age- and multivariable-adjusted hazard ratios for cause-specific mortality accounting for competing risks according to migraine subtypes or non-migraine headache status (N=27,844).**

| <b>Migraine or headache status:</b>    | <b>No history, (N=18,691)</b> | <b>Non-migraine headache, (N=4,025)</b> | <b>Migraine with aura, (N=1,435)</b> | <b>Migraine without aura, (N=2,175)</b> | <b>Past history of migraine, (N=1,518)</b> |
|----------------------------------------|-------------------------------|-----------------------------------------|--------------------------------------|-----------------------------------------|--------------------------------------------|
|                                        | <b>HR -ref-</b>               | <b>HR (95% CI)</b>                      | <b>HR (95% CI)</b>                   | <b>HR (95% CI)</b>                      | <b>HR (95% CI)</b>                         |
| <b>Cardiovascular death, N</b>         | 281                           | 46                                      | 22                                   | 12                                      | 25                                         |
| Age-adjusted <sup>a</sup>              | 1 (ref)                       | 1.07 (0.78-1.45)                        | 1.53 (0.99-2.38)                     | 0.65 (0.36-1.15)                        | 1.07 (0.71-1.61)                           |
| Multivariable-adjusted <sup>b</sup>    | 1 (ref)                       | 0.97 (0.71-1.33)                        | 1.63 (1.05-2.53)                     | 0.68 (0.38-1.21)                        | 1.01 (0.67-1.53)                           |
| <b>Cancer death, N</b>                 | 861                           | 164                                     | 48                                   | 85                                      | 66                                         |
| Age-adjusted <sup>a</sup>              | 1 (ref)                       | 1.01 (0.85-1.19)                        | 0.84 (0.63-1.14)                     | 1.05 (0.84-1.31)                        | 0.93 (0.73-1.20)                           |
| Multivariable-adjusted <sup>b</sup>    | 1 (ref)                       | 1.02 (0.86-1.21)                        | 0.88 (0.66-1.17)                     | 1.10 (0.88-1.38)                        | 0.93 (0.72-1.20)                           |
| <b>Female-specific cancer death, N</b> | 248                           | 41                                      | 12                                   | 26                                      | 15                                         |
| Age-adjusted <sup>a</sup>              | 1 (ref)                       | 0.85 (0.61-1.18)                        | 0.71 (0.40-1.28)                     | 1.06 (0.71-1.59)                        | 0.73 (0.44-1.24)                           |
| Multivariable-adjusted <sup>b</sup>    | 1 (ref)                       | 0.87 (0.62-1.21)                        | 0.73 (0.41-1.30)                     | 1.09 (0.72-1.63)                        | 0.75 (0.45-1.26)                           |

Abbreviations: HR, hazard ratio; CI, confidence interval; ref, reference category.

Hazard ratios and corresponding 95% confidence intervals were estimated using Fine-Gray subdistribution hazard models. For each model, any deaths due to causes other than the cause of interest were treated as competing events in the models.

<sup>a</sup>Adjusted for age at baseline

<sup>b</sup>Adjusted for the following variables measured at baseline: age, BMI, total cholesterol, smoking, alcohol use, physical activity, diabetes, hypertension, family history of myocardial infarction, and family history of cancer (categorizations described in detail in the Methods).
